# Supplementary material for: Survival Outcomes Are Not Affected When Liver Transplant Surgery Is Done at Night, During Weekends, or Summer Months
Source: PubMed Central journal article supplement — Transplant Direct. 2019 Apr 25;5(5):e449. doi: 10.1097/TXD.0000000000000887 (PMC6511448; doi:10.1097/txd.0000000000000887), 2019-04-25

**Table S1. The unadjusted hazard rate ratios for the graft loss and patient mortality.**

|                            | Graft failure          |                | Patient mortality      |                |
|----------------------------|------------------------|----------------|------------------------|----------------|
|                            | Unadjusted HR (95% CI) | <i>P</i> value | Unadjusted HR (95% CI) | <i>P</i> value |
| Age                        | 1.01 (1.01-1.01)       | <0.01          | 1.02 (1.01-1.02)       | <0.01          |
| Gender: Male               | 1.00                   |                | 1.00                   |                |
| Female                     | 0.95 (0.91-0.98)       | <0.01          | 0.95 (0.92-0.99)       | <0.01          |
| Race: White                | 1.00                   |                | 1.00                   |                |
| Black                      | 1.28 (1.21-1.35)       | <0.01          | 1.26 (1.19-1.33)       | <0.01          |
| Hispanic                   | 0.94 (0.89-0.99)       | 0.02           | 0.94 (0.89-1.00)       | 0.04           |
| Asian                      | 0.78 (0.69-0.87)       | <0.01          | 0.75 (0.66-0.85)       | <0.01          |
| Other                      | 0.98 (0.83-1.15)       | 0.79           | 0.97 (0.82-1.16)       | 0.76           |
| Morbid obesity             | 1.09 (1.00-1.19)       | 0.06           | 1.11 (1.02-1.22)       | 0.02           |
| BMI                        | 1.00 (1.00-1.00)       | 0.85           | 1.00 (1.00-1.01)       | 0.22           |
| Diagnosis: PBC and PSC     | 1.00                   |                | 1.00                   |                |
| HCV                        | 1.51 (1.42-1.61)       | <0.01          | 1.77 (1.65-1.89)       | <0.01          |
| AC                         | 1.18 (1.10-1.27)       | <0.01          | 1.39 (1.29-1.50)       | <0.01          |
| AIH                        | 1.18 (1.056-1.32)      | <0.01          | 1.30 (1.15-1.46)       | <0.01          |
| HCC                        | 3.56 (1.48-8.56)       | <0.01          | 4.81 (2.00-11.57)      | <0.01          |
| NASH and Cryptogenic       | 1.20 (1.12-1.29)       | <0.01          | 1.41 (1.30-1.52)       | <0.01          |
| Other                      | 1.18 (1.10-1.26)       | <0.01          | 1.30 (1.21-1.41)       | <0.01          |
| MELD score                 | 1.01 (1.01-1.01)       | <0.01          | 1.01 (1.01-1.01)       | <0.01          |
| Encephalopathy             | 1.15 (1.10-1.20)       | <0.01          | 1.20 (1.16-1.26)       | <0.01          |
| Center, LTs per year <20   | 1.00                   |                | 1.00                   |                |
| 20-50                      | 1.03 (0.92-1.15)       | 0.6            | 0.97 (0.87-1.083)      | 0.57           |
| >50                        | 0.98 (0.89-1.09)       | 0.77           | 0.90 (0.81-1.09)       | 0.07           |
| Time of surgery: 7 AM-9 PM | 1.00                   |                | 1.00                   |                |
| 10 PM-6 AM                 | 0.97 (0.91-1.03)       | 0.27           | 0.96 (0.91-1.03)       | 0.24           |

|                          | <b>Graft failure</b>          |                       | <b>Patient mortality</b>      |                       |
|--------------------------|-------------------------------|-----------------------|-------------------------------|-----------------------|
|                          | <b>Unadjusted HR (95% CI)</b> | <b><i>P</i> value</b> | <b>Unadjusted HR (95% CI)</b> | <b><i>P</i> value</b> |
| Week day                 | 1.00                          |                       | 1.00                          |                       |
| Weekend                  | 0.99 (0.95-1.03)              | 0.57                  | 0.99 (0.96-1.04)              | 0.78                  |
| Spring, Fall, and Winter | 1.00                          |                       | 1.00                          |                       |
| Summer                   | 0.98 (0.94-1.02)              | 0.29                  | 0.99 (0.95-1.03)              | 0.52                  |
| Donor Risk Index         | 1.39 (1.34-1.44)              | <0.01                 | 1.33 (1.28-1.38)              | <0.01                 |

**Figure S1. The patient survival comparing holidays (Thanksgiving and Christmas week) and also weekdays and weekends (after excluding these holidays from these two groups) ( $P$  value = 0.99).**

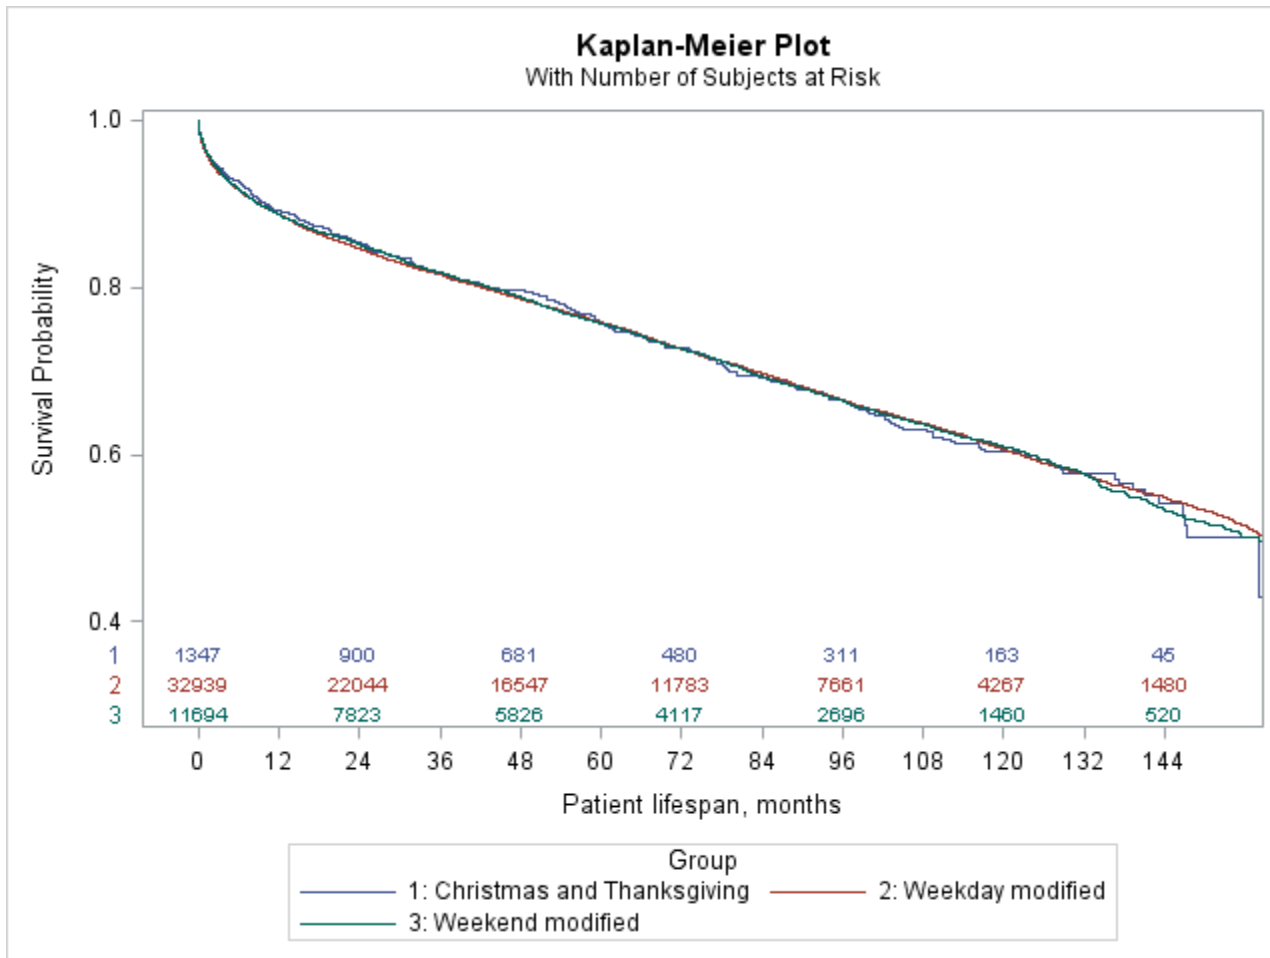

Figure S2A. Patient survival for HCC individuals stratified by night/day ( $P = 0.1$ ).

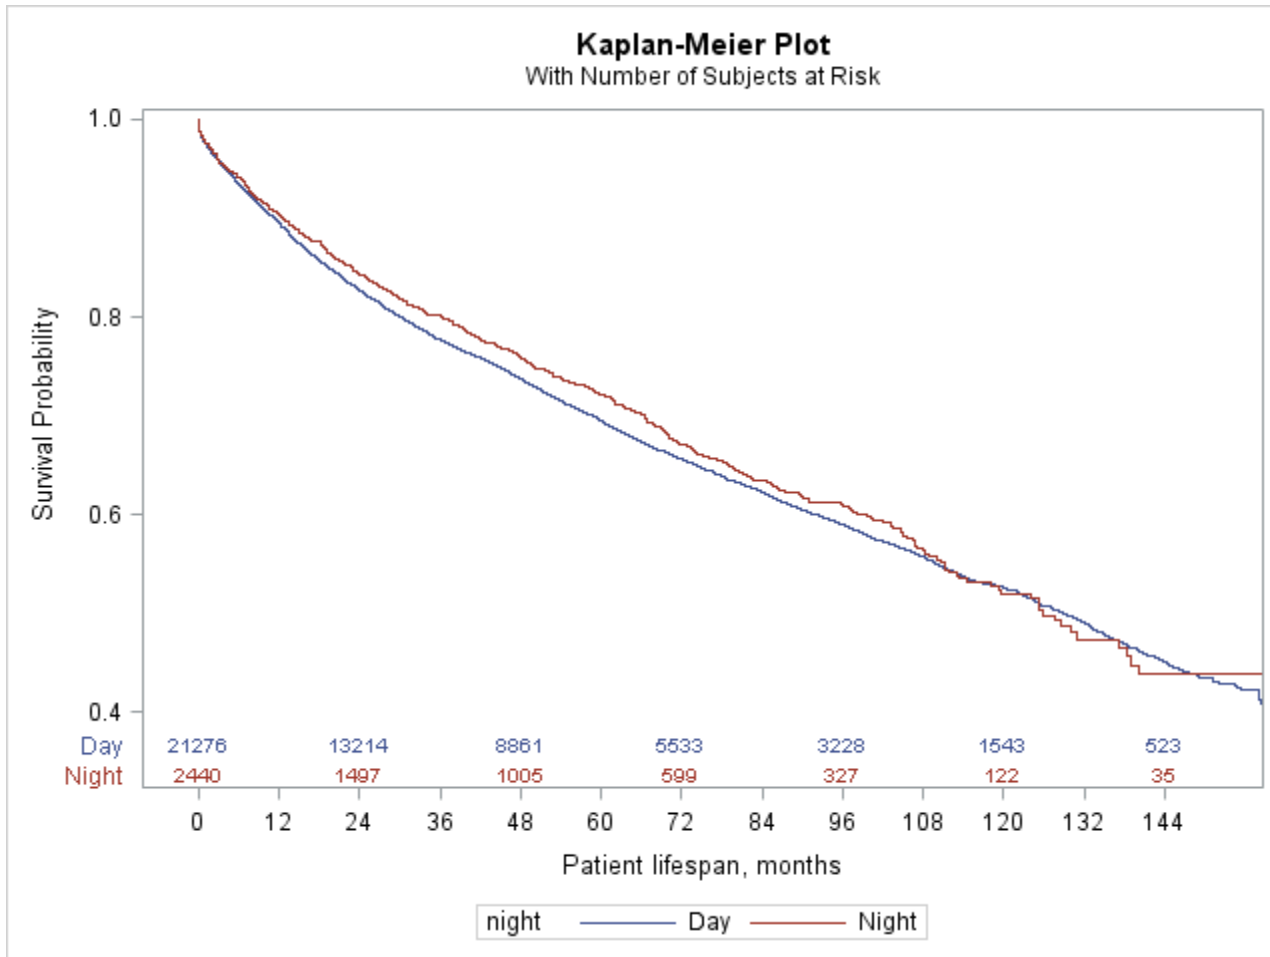

Figure S2B. Patient survival for HCC individuals stratified by weekend/week day ( $P = 0.2$ ).

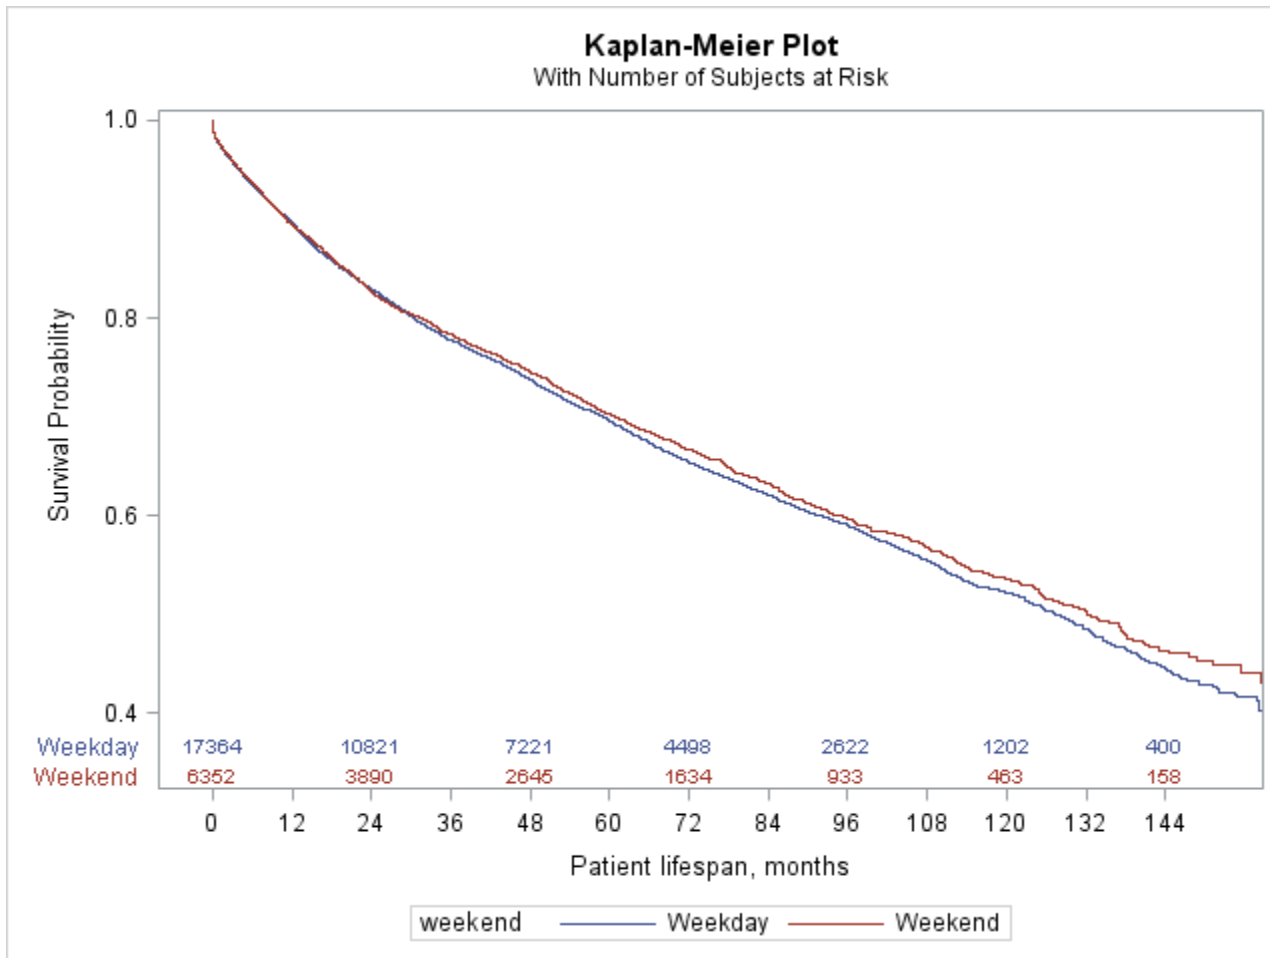

Figure S2C. Patient survival for HCC individuals stratified by summer/other months ( $P = 0.24$ ).

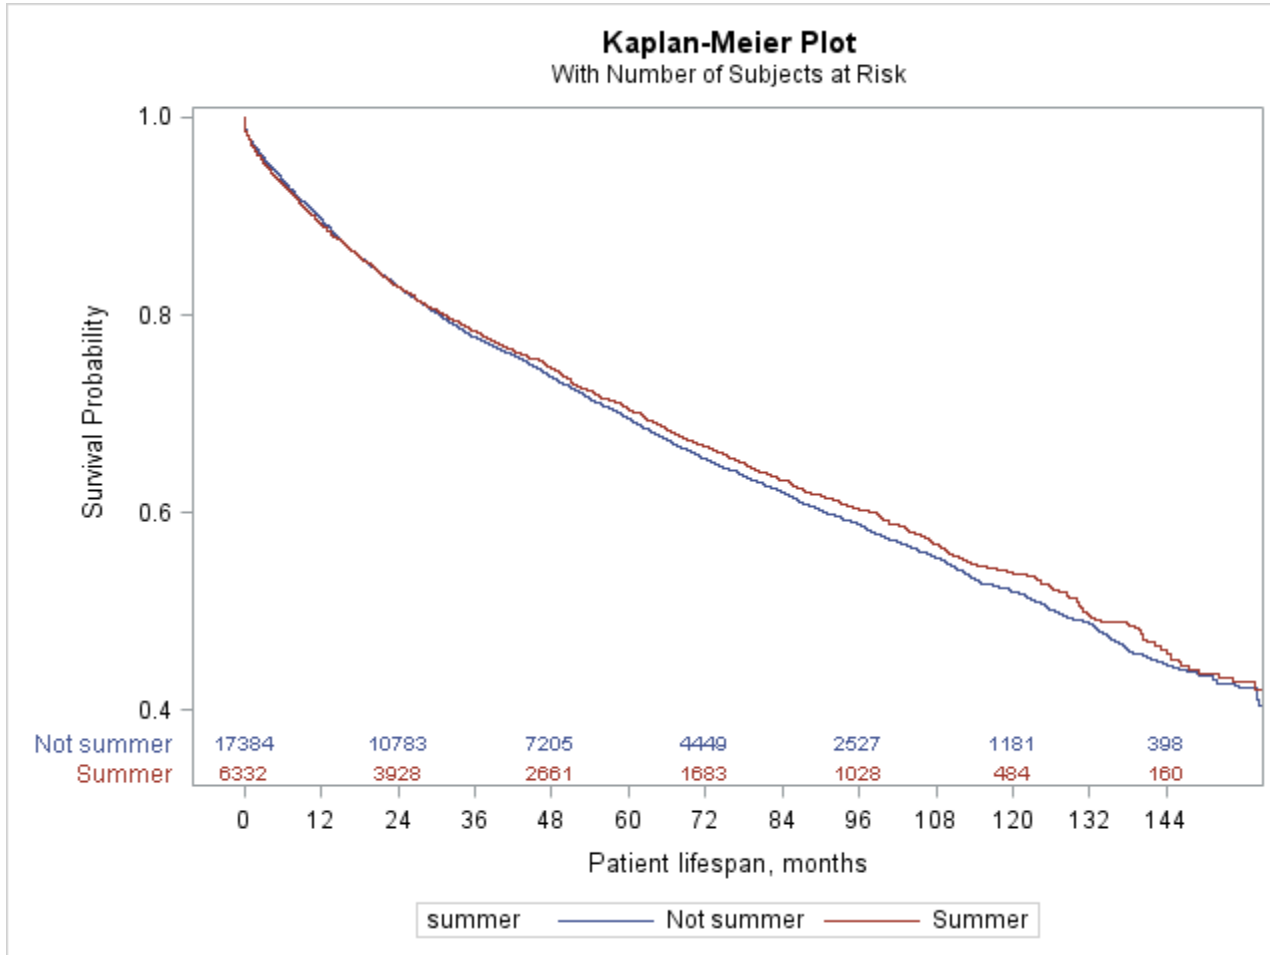

Supplement: txd-5-e449-s001.pdf [file txd-5-e449-s001.pdf]
